# Supplementary material for: AKAP12 Upregulation Associates With PDE8A to Accelerate Cardiac Dysfunction
Source: PubMed Central journal article supplement — Circ Res. 2024 Mar 20;134(8):1006–22. doi: 10.1161/CIRCRESAHA.123.323655 (PMC11075752; doi:10.1161/circresaha.123.323655), 2024-03-20

Full unedited gel for Figure1 (B)

**AKAP12**

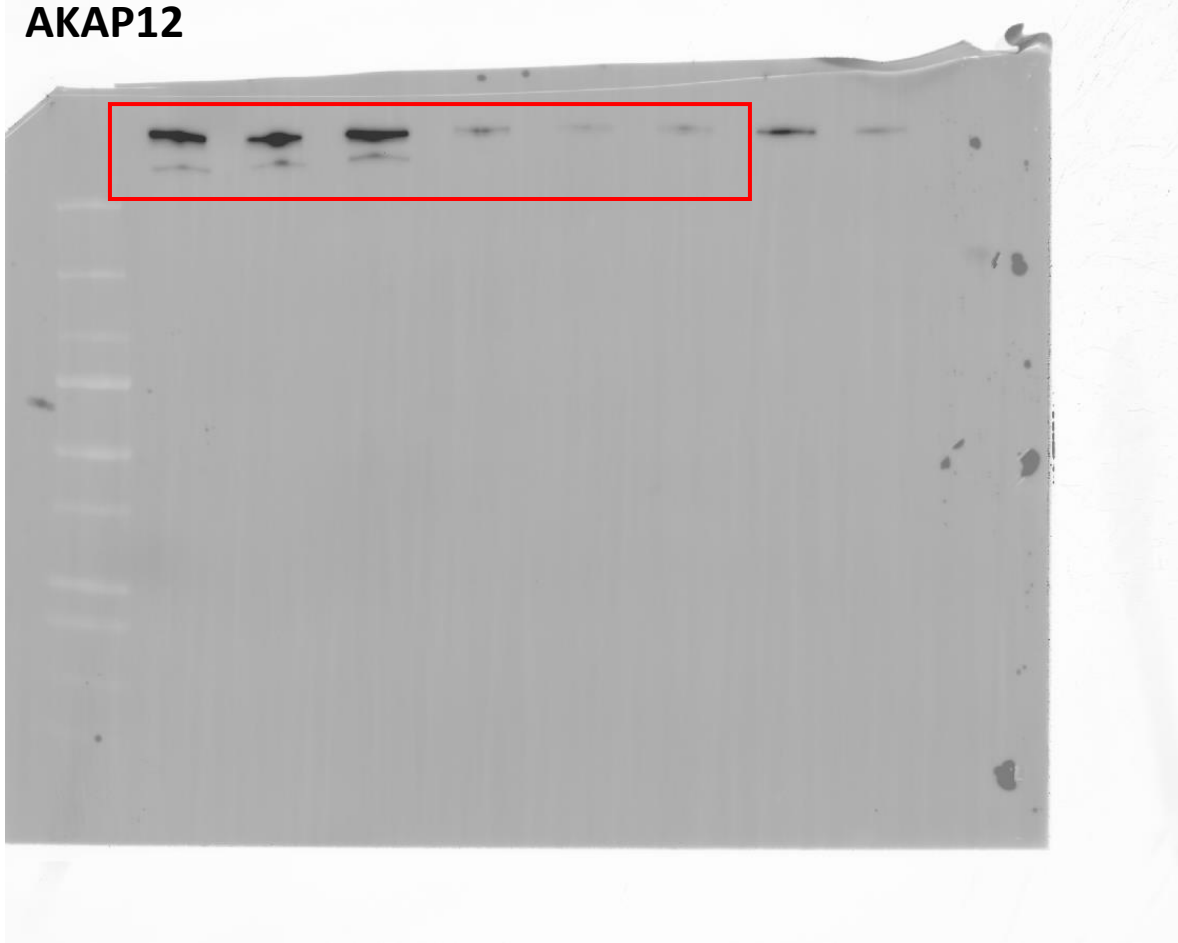

**Total Protein**

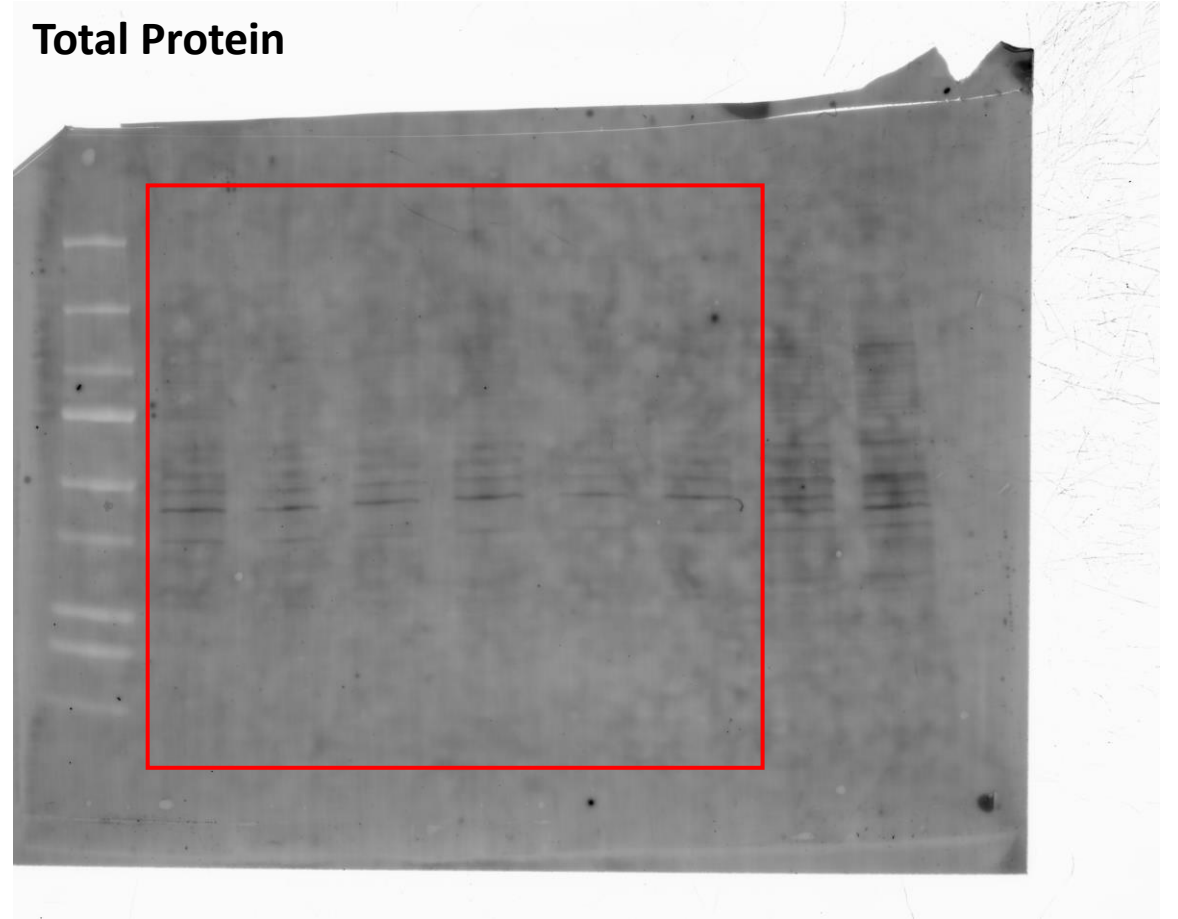

Full unedited gel for Supplemental Figure1 (C)

Gai

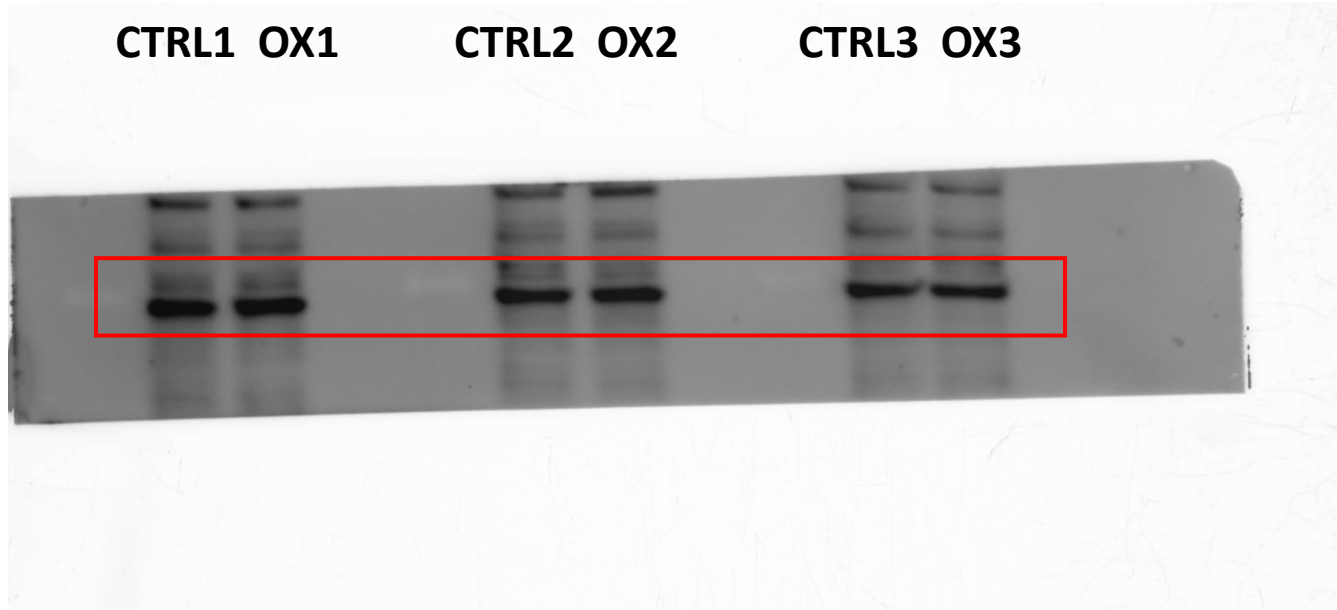

GAPDH

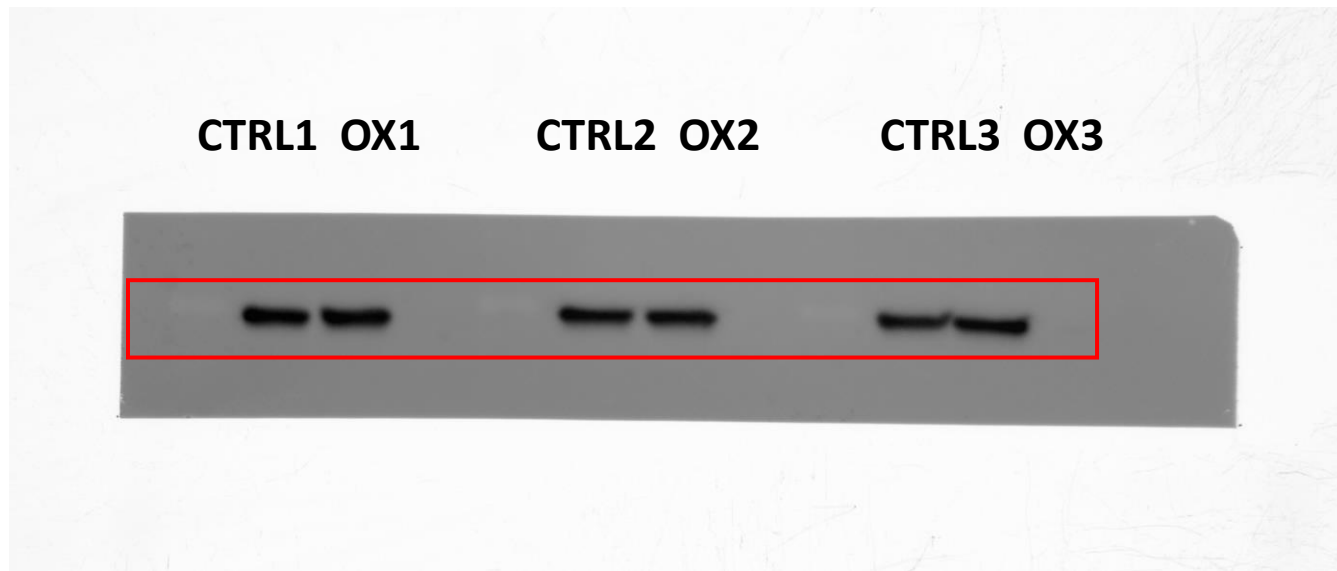

Full unedited gel for Figure2 (A)

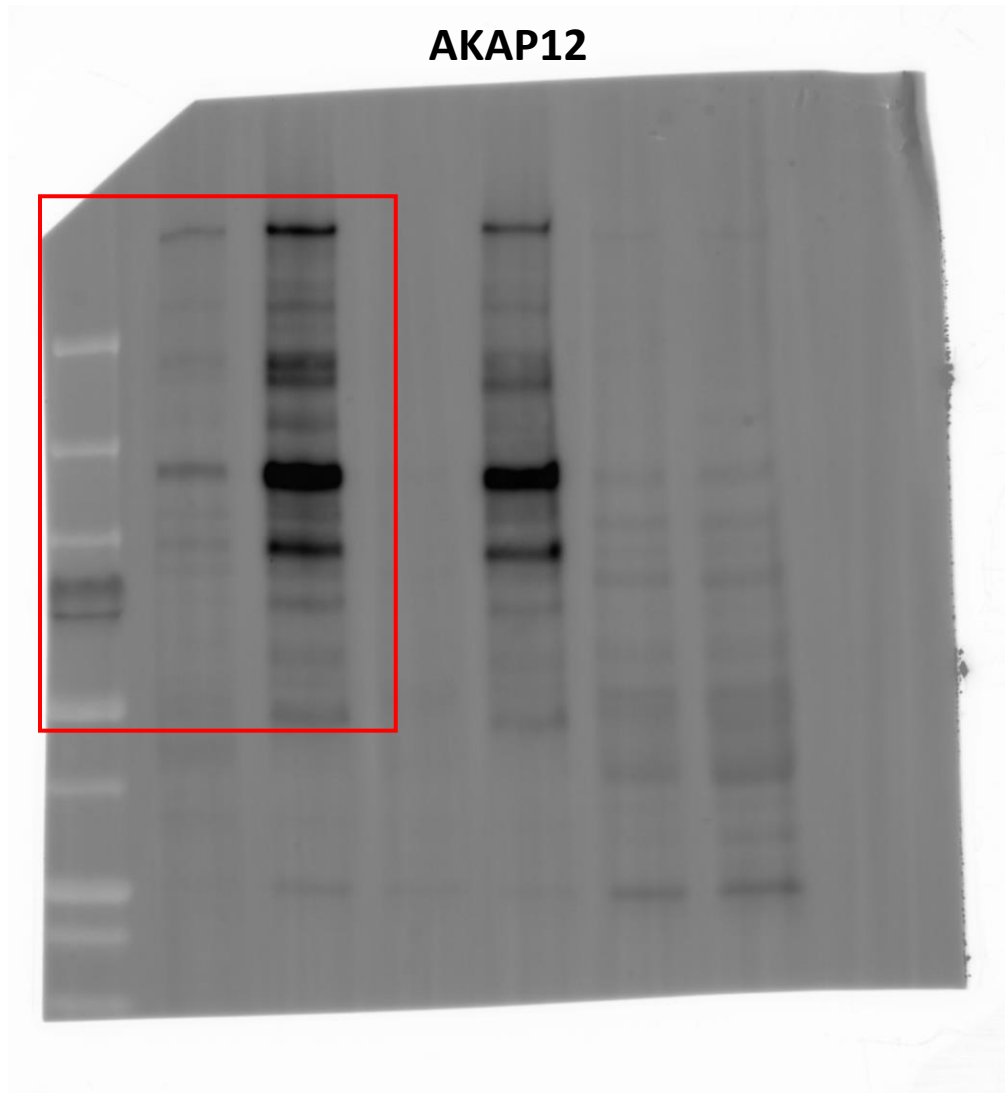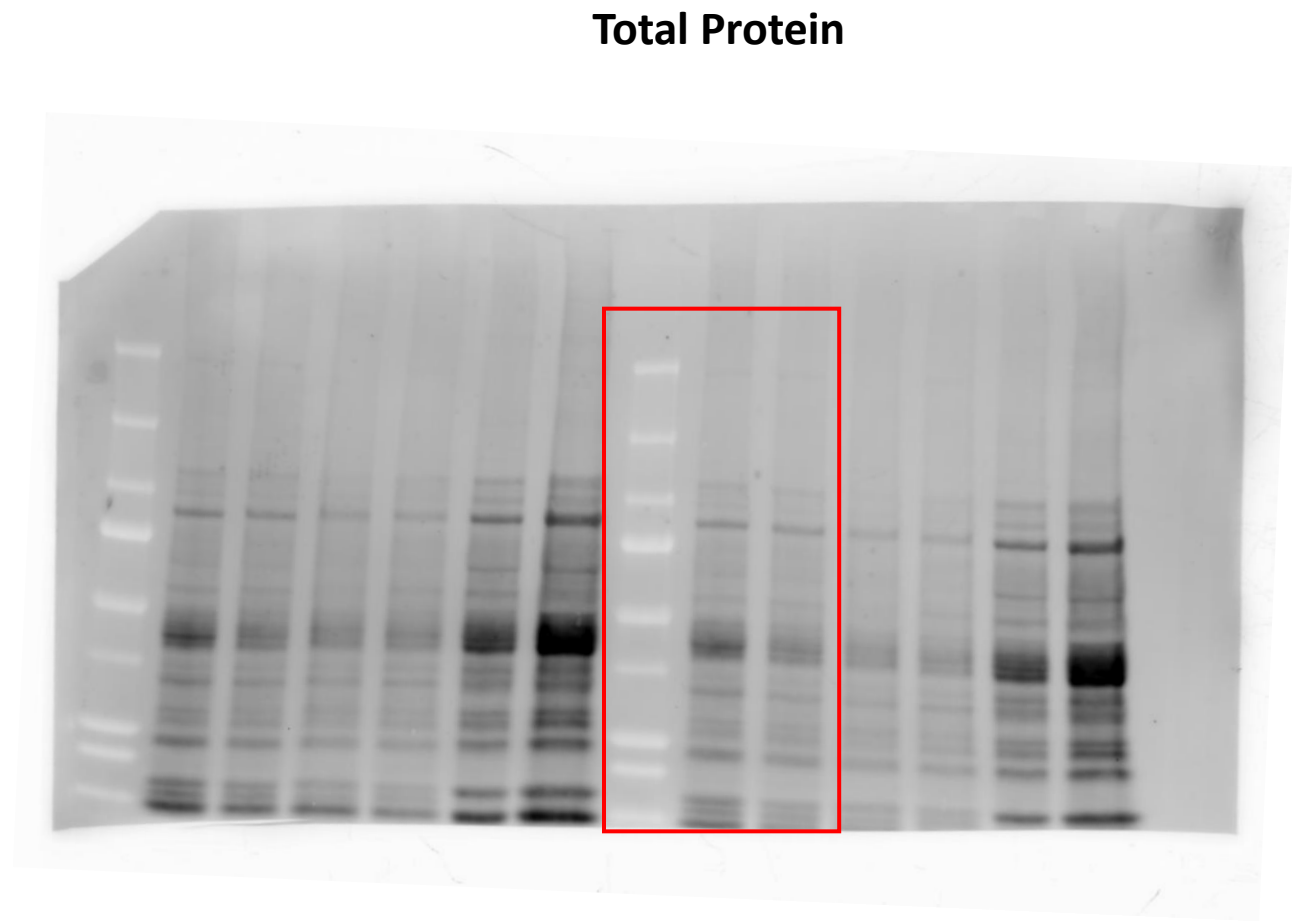

# Full unedited gel for Supplemental Figure2 (D)

## PDE8A

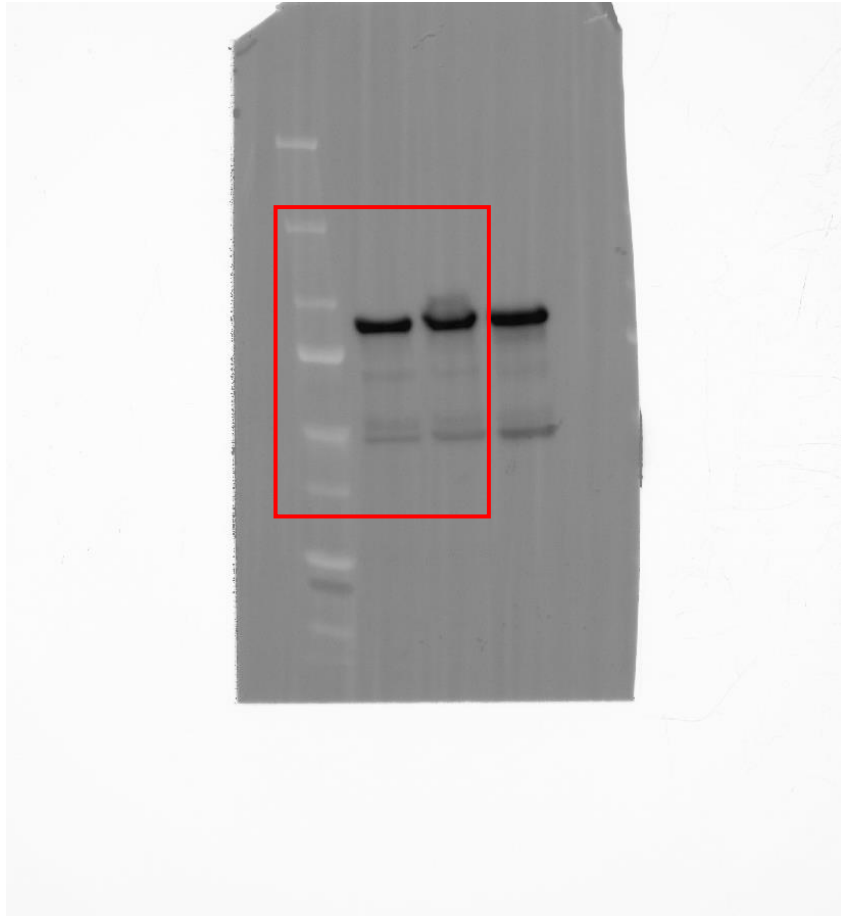

## Total Protein

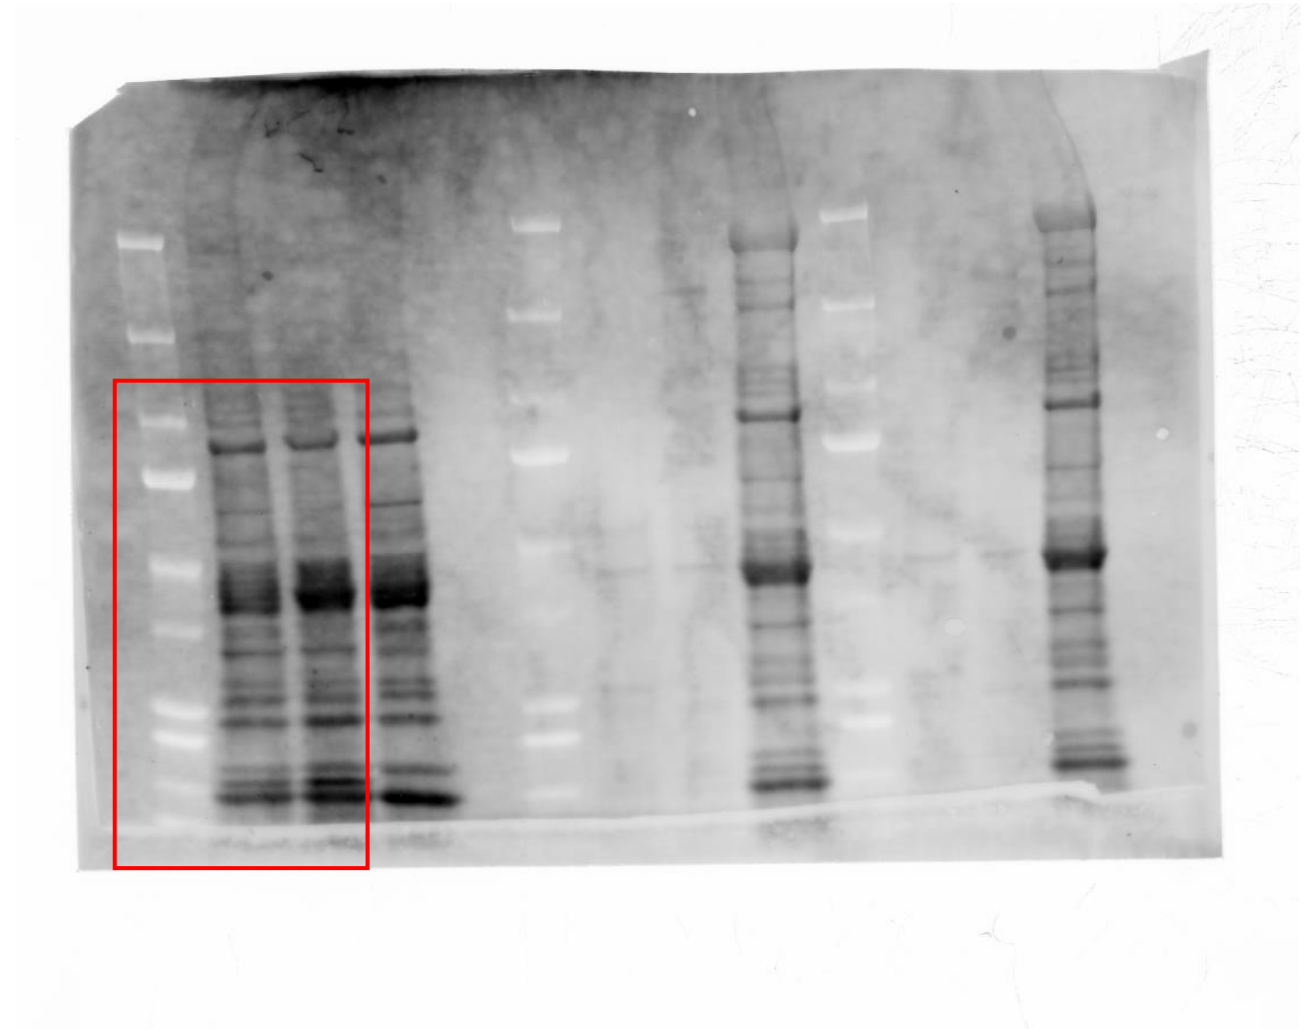

# Full unedited gel for Supplemental Figure-3, Females blots

## Cardiac Phospho -Troponin - I

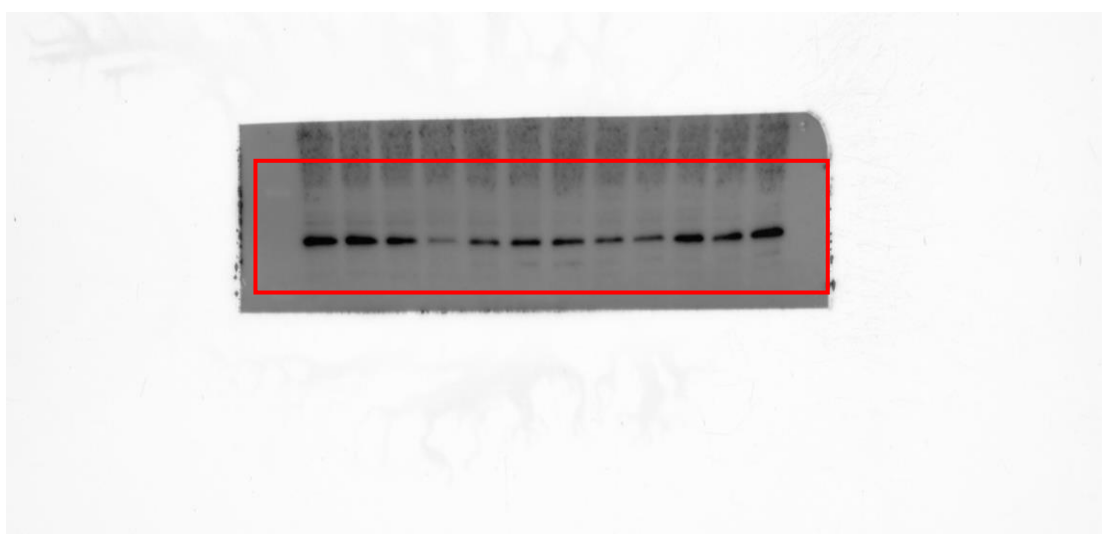

## Total protein

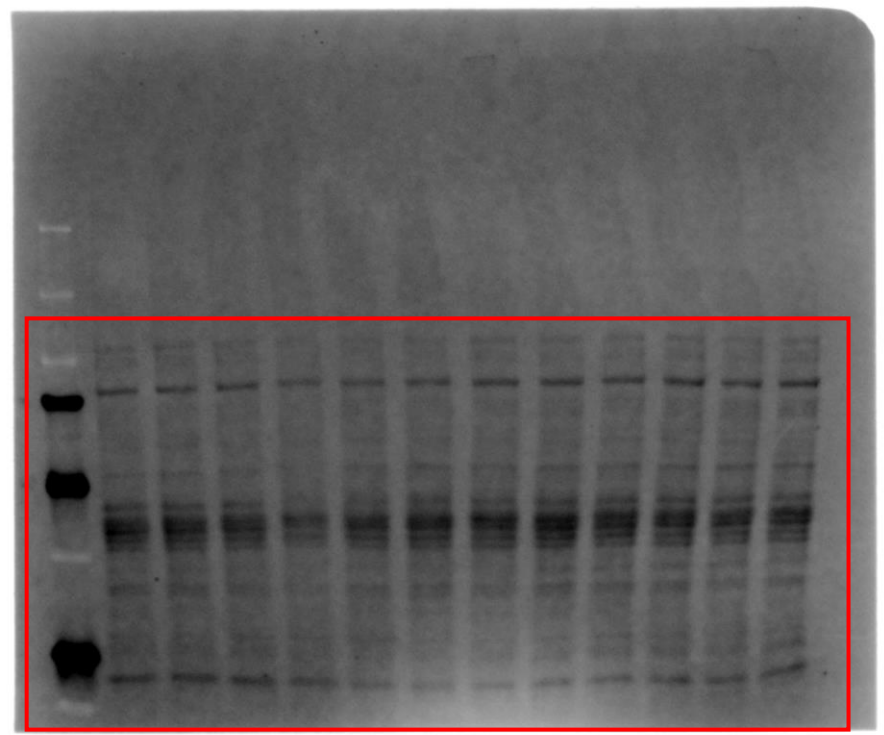

# Full unedited gel for Supplemental Figure-3, Females blots

## Cardiac Troponin - I

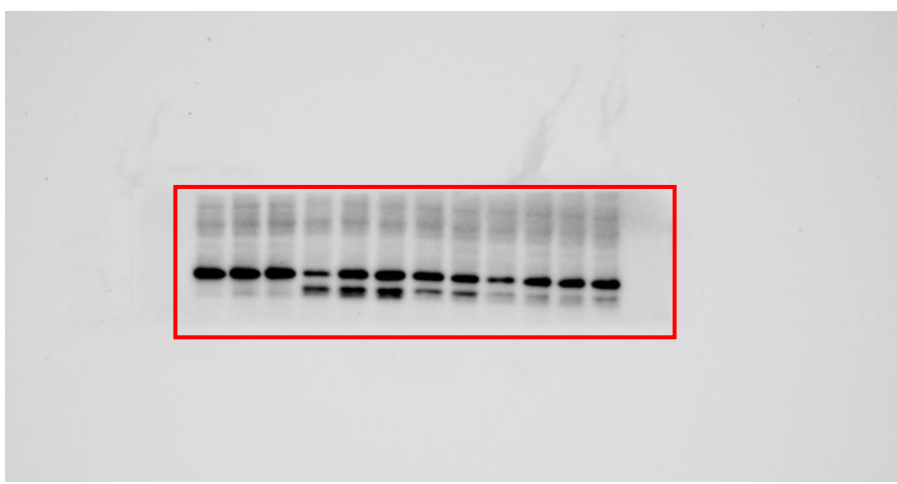

## Total protein

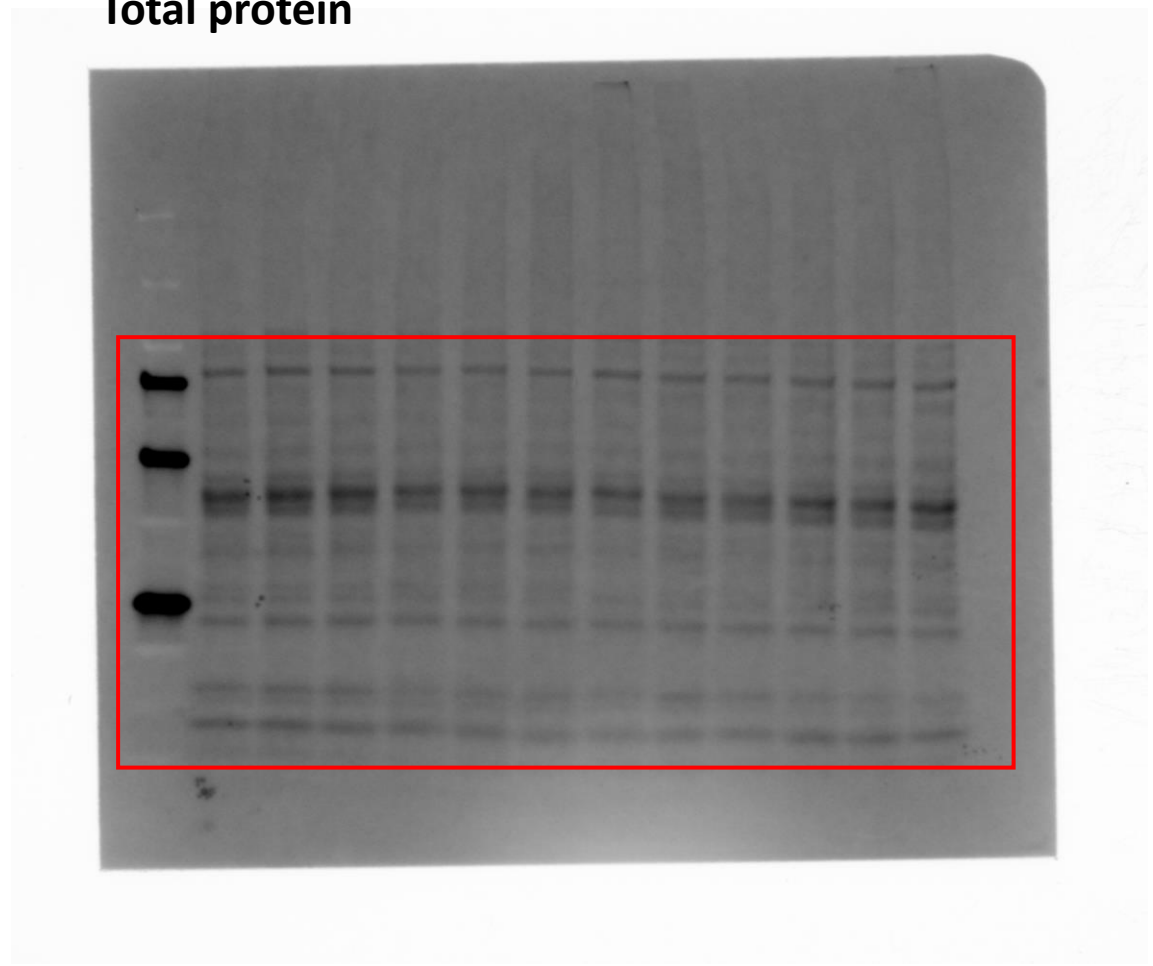

# Full unedited gel for Supplemental Figure-3, Males blots

## Cardiac Troponin - I

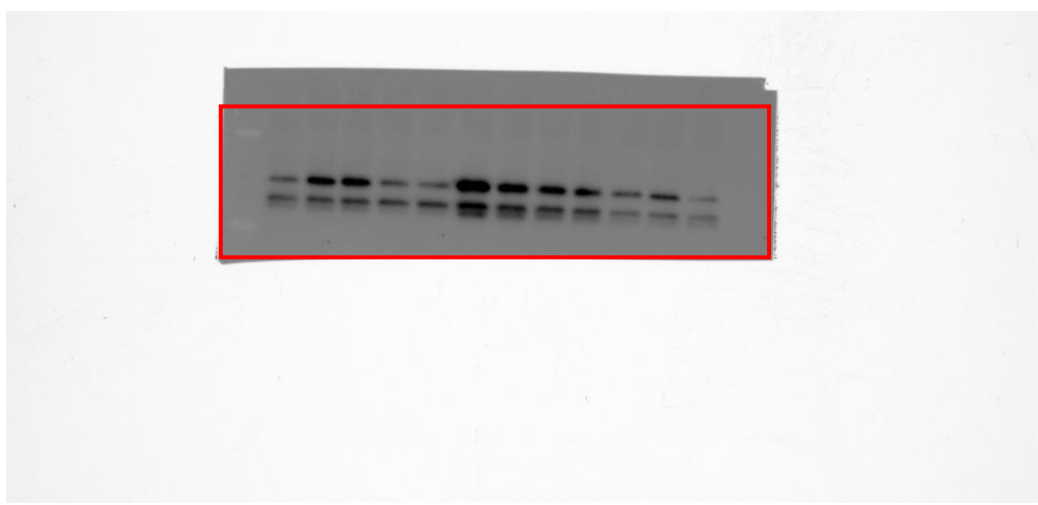

## Total protein

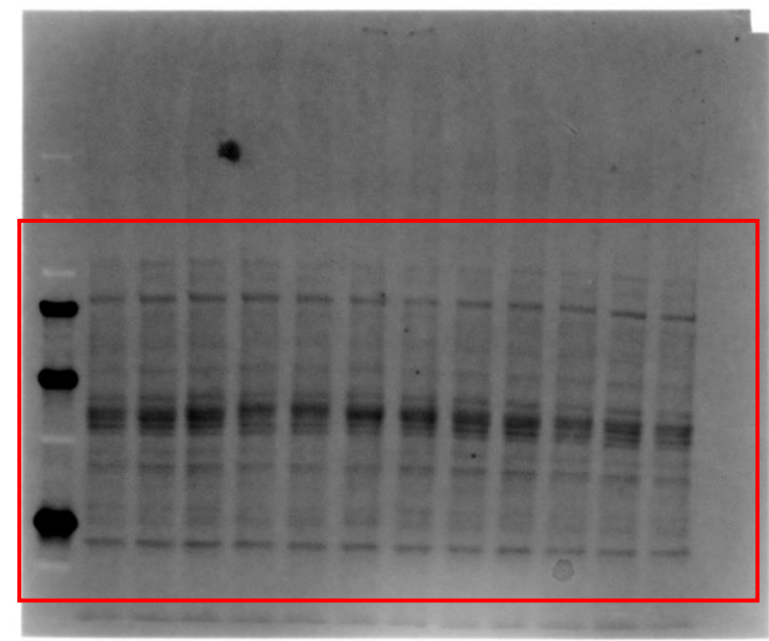

# Full unedited gel for Supplemental Figure-3, Males blots

## Cardiac Phospho Troponin - I

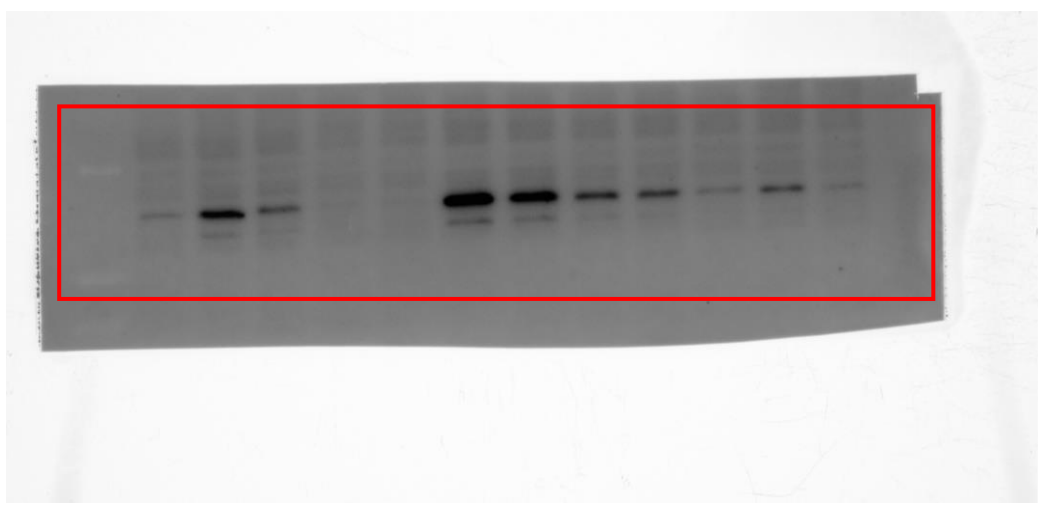

## Total protein

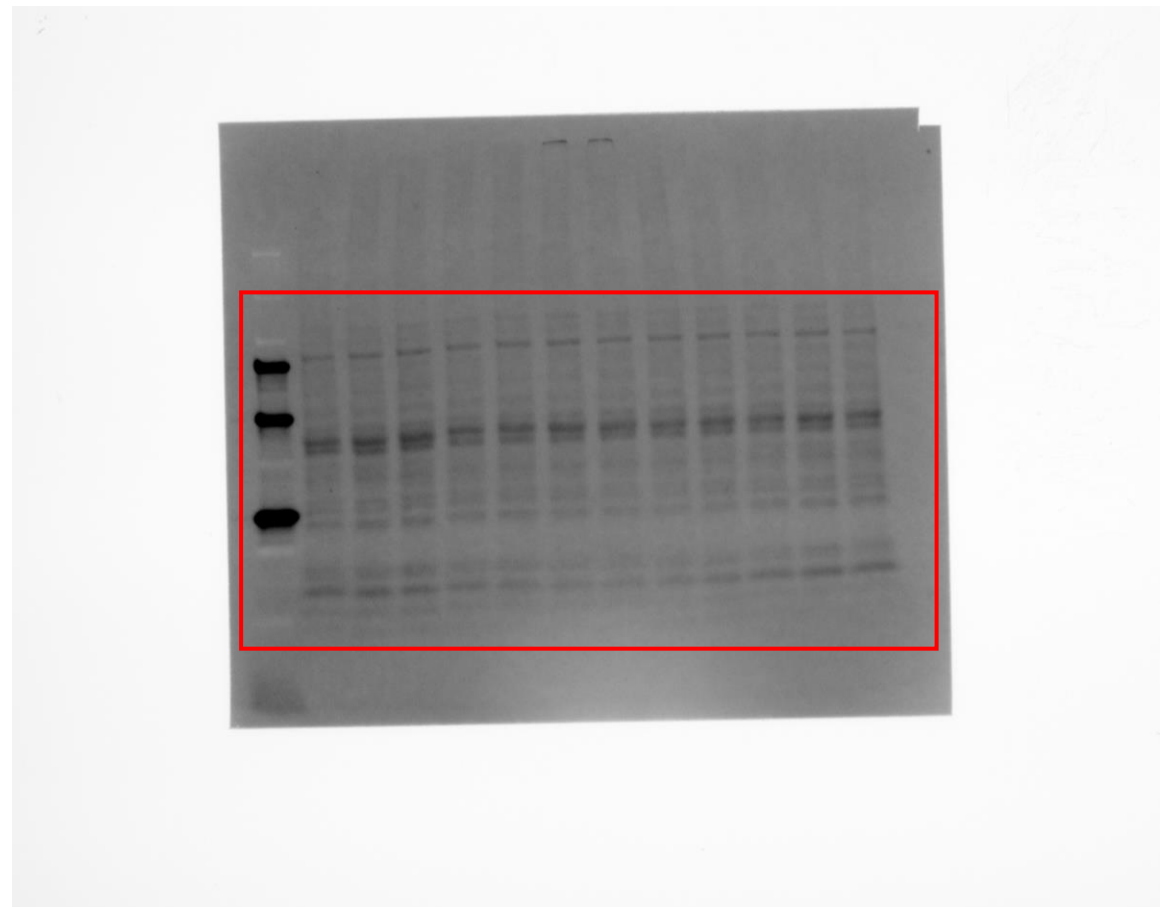



# Full unedited gel for Figure-8 (C)

## AKAP12

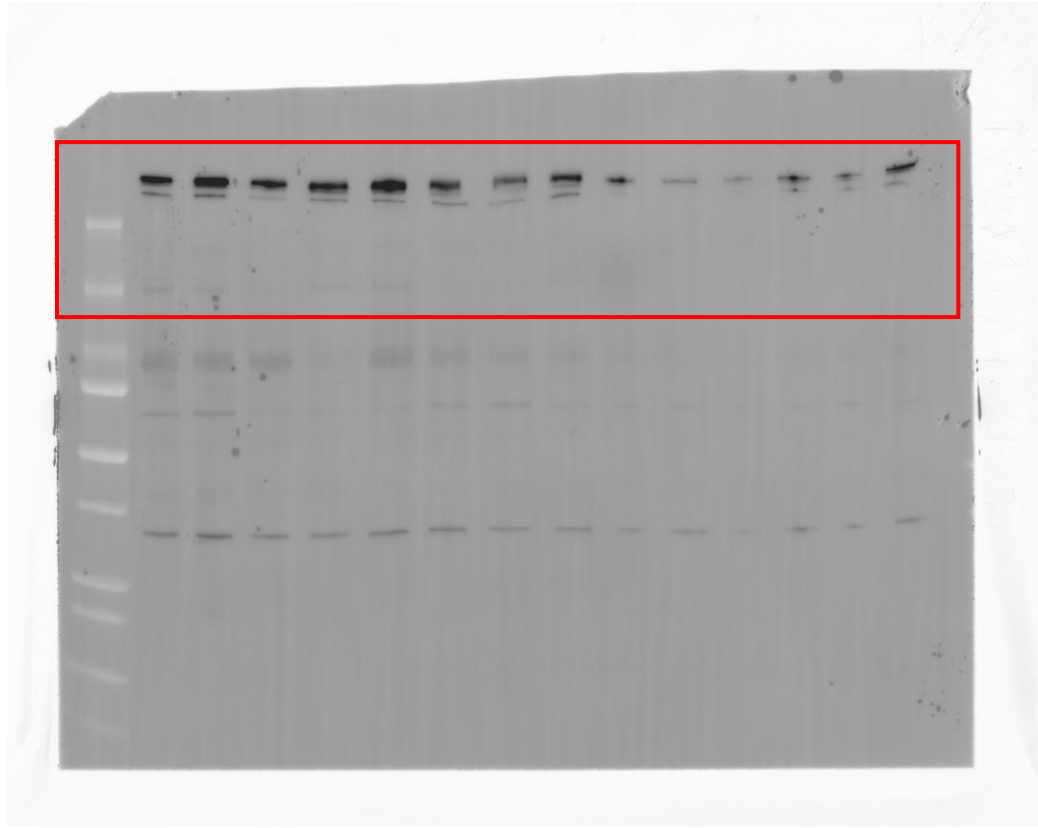

## Total protein

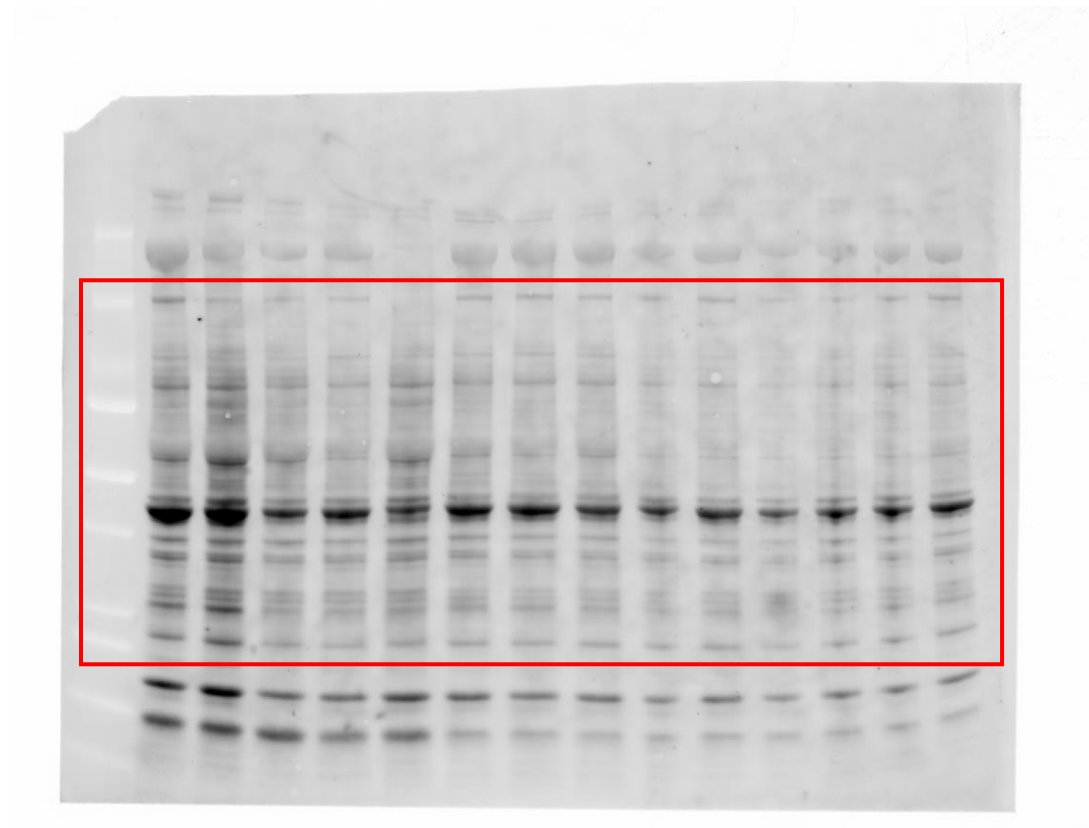

Supplement: res-134-1006-s002.pdf [file res-134-1006-s002.pdf]
