# Supplementary material for: AKAP12 Upregulation Associates With PDE8A to Accelerate Cardiac Dysfunction
Source: PubMed Central journal article supplement — Circ Res. 2024 Mar 20;134(8):1006–22. doi: 10.1161/CIRCRESAHA.123.323655 (PMC11075752; doi:10.1161/circresaha.123.323655), 2024-03-20
Supplement: res-134-1006-s001.pdf [file res-134-1006-s001.pdf]

## Major Resources Table

In order to allow validation and replication of experiments, all essential research materials listed in the Methods should be included in the Major Resources Table below. Authors are encouraged to use public repositories for protocols, data, code, and other materials and provide persistent identifiers and/or links to repositories when available. Authors may add or delete rows as needed.

### Animals (in vivo studies)

| Species                      | Vendor or Source | Background Strain | Sex               | Persistent ID / URL |
|------------------------------|------------------|-------------------|-------------------|---------------------|
| Wild Type (WT)               | Jax labs         | C57BL/6           | Males and females |                     |
| C57BL/6-oxAKAP12 (Gravin)-Tg | In house lab*    | C57BL/6           | Males and Females |                     |

\* In process of facilitating mice availability at Jax labs

### Genetically Modified Animals

|                 | Species      | Vendor or Source             | Background Strain | Other Information                   | Persistent ID / URL |
|-----------------|--------------|------------------------------|-------------------|-------------------------------------|---------------------|
| Parent - Male   | Mus musculus | Texas A&M-IBT (in house lab) | FVB               | Backcrossed (>5 times) into C57BL/6 |                     |
| Parent - Female | Mus musculus | Texas A&M-IBT (in house lab) | FVB               | Backcrossed (>5 times) into C57BL/6 |                     |

### Antibodies

| Target antigen                                                               | Vendor or Source                            | Catalog #  | Working concentration | Lot # (preferred but not required) | Persistent ID / URL                                                                                                                                                                                                             |
|------------------------------------------------------------------------------|---------------------------------------------|------------|-----------------------|------------------------------------|---------------------------------------------------------------------------------------------------------------------------------------------------------------------------------------------------------------------------------|
| AKAP12 – C-terminal<br><i>Used for western blots</i>                         | Abcam Inc. Cambridge, UK                    | ab204559   | 1:1000                |                                    | <a href="https://www.abcam.com/products/primary-antibodies/akap12-antibody-c-terminal-ab204559.html">https://www.abcam.com/products/primary-antibodies/akap12-antibody-c-terminal-ab204559.html</a>                             |
| AKAP12 - Anti-Gravin Antibody, Mouse Monoclonal<br><i>Used for ICC</i>       | Sigma-Aldrich                               | G3795      | 1:100                 | 028M4766V & 0000123814             | <a href="https://www.sigmaaldrich.com/id/id_en/g3795-200ul-id">https://www.sigmaaldrich.com/id/id_en/g3795-200ul-id</a>                                                                                                         |
| PDE8A Antibody Polyclonal<br><i>Used for western blots</i>                   | Thermo Fisher Scientific™, Waltham, MA, USA | PA5-88405  | 1:1000                |                                    | <a href="https://www.thermofisher.com/antibody/product/PDE8A-Antibody-Polyclonal/PA5-88405">https://www.thermofisher.com/antibody/product/PDE8A-Antibody-Polyclonal/PA5-88405</a>                                               |
| PDE8A Polyclonal antibody<br><i>Used for ICC</i>                             | ProteinTech                                 | 13956-1-AP | 1:100                 | 00005031                           | <a href="https://www.ptglab.com/products/PDE8A-Antibody-13956-1-AP.htm">https://www.ptglab.com/products/PDE8A-Antibody-13956-1-AP.htm</a>                                                                                       |
| WGA (wheat germ agglutinin) Alexa Fluor 488 conjugate<br><i>Used for ICC</i> | Thermo Fisher Scientific™, Waltham, MA, USA | W11261     | 100µg/ml              |                                    | <a href="https://www.thermofisher.com/order/catalog/product/W11261">https://www.thermofisher.com/order/catalog/product/W11261</a>                                                                                               |
| troponin I Rabbit Ab<br><i>Used for western blots</i>                        | Cell Signaling, Danvers, MA, USA            | 4002S      | 1:1000                | Ref:10/2015 Lot:2                  | <a href="https://www.cellsignal.com/products/primary-antibodies/troponin-i-antibody/4002">https://www.cellsignal.com/products/primary-antibodies/troponin-i-antibody/4002</a>                                                   |
| p-troponin I(cardiac)(S23/24) Rabbit Ab<br><i>Used for western blots</i>     | Cell Signaling, Danvers, MA, USA            | 4004S      | 1:1000                | Ref:05/2012 Lot:2                  | <a href="https://www.cellsignal.com/products/primary-antibodies/phospho-troponin-i-cardiac-ser23-24-antibody/4004">https://www.cellsignal.com/products/primary-antibodies/phospho-troponin-i-cardiac-ser23-24-antibody/4004</a> |

DOI [to be added]

|                                                                       |                                  |        |        |         |                                                                                                                                                                                                                                                                                       |
|-----------------------------------------------------------------------|----------------------------------|--------|--------|---------|---------------------------------------------------------------------------------------------------------------------------------------------------------------------------------------------------------------------------------------------------------------------------------------|
| Anti-rabbit IgG, HRP-linked Antibody<br><i>Used for western blots</i> | Cell Signaling, Danvers, MA, USA | 7074   | 1:1000 |         | <a href="https://www.cellsignal.com/products/secondary-antibodies/anti-rabbit-igg-hrp-linked-antibody/7074">https://www.cellsignal.com/products/secondary-antibodies/anti-rabbit-igg-hrp-linked-antibody/7074</a>                                                                     |
| Anti-mouse IgG, HRP-linked Antibody<br><i>Used for western blots</i>  | Cell Signaling, Danvers, MA, USA | 7076   | 1:1000 |         | <a href="https://www.cellsignal.com/products/secondary-antibodies/anti-mouse-igg-hrp-linked-antibody/7076">https://www.cellsignal.com/products/secondary-antibodies/anti-mouse-igg-hrp-linked-antibody/7076</a>                                                                       |
| Alexa Flour 488 goat anti-mouse<br><i>Used for ICC</i>                | Invitrogen, life technologies    | A11001 | 1:500  | 2714439 | <a href="https://www.thermofisher.com/antibody/product/Goat-anti-Mouse-IgG-H-L-Cross-Adsorbed-Secondary-Antibody-Polyclonal/A-11001">https://www.thermofisher.com/antibody/product/Goat-anti-Mouse-IgG-H-L-Cross-Adsorbed-Secondary-Antibody-Polyclonal/A-11001</a>                   |
| Alexa Flour 568 donkey anti-rabbit<br><i>Used for ICC</i>             | Invitrogen, life technologies    | A10042 | 1:500  | 2540901 | <a href="https://www.thermofisher.com/antibody/product/Donkey-anti-Rabbit-IgG-H-L-Highly-Cross-Adsorbed-Secondary-Antibody-Polyclonal/A10042">https://www.thermofisher.com/antibody/product/Donkey-anti-Rabbit-IgG-H-L-Highly-Cross-Adsorbed-Secondary-Antibody-Polyclonal/A10042</a> |

### DNA/cDNA Clones

| Clone Name             | Sequence   | Source / Repository              | Persistent ID / URL                                                                                                                               |
|------------------------|------------|----------------------------------|---------------------------------------------------------------------------------------------------------------------------------------------------|
| Human AKAP12 (hAKAP12) | HG18215-UT | Sino Biologicals, Wayne, PA, USA | <a href="https://www.sinobiological.com/cdna-clone/human-akap12-hg18215-ut">https://www.sinobiological.com/cdna-clone/human-akap12-hg18215-ut</a> |
|                        |            |                                  |                                                                                                                                                   |

### Cultured Cells

| Name                                            | Vendor or Source | Sex (F, M, or unknown) | Persistent ID / URL                                                                                                                                                                                                                                                                                                         |
|-------------------------------------------------|------------------|------------------------|-----------------------------------------------------------------------------------------------------------------------------------------------------------------------------------------------------------------------------------------------------------------------------------------------------------------------------|
| AC16 Human Cardiomyocyte Cell Line <sup>1</sup> | Millipore Sigma  | Unknown                | <a href="https://www.sigmaaldrich.com/US/en/product/mm/scc109?gclid=CjwKCAiAqNSsBhAvEiwAn_tmXy5Ra9IYHp0xTVteqErJ2Ou1pAzyrv0AV1aVeEJzUsWowUB9lpMaQBoCHNMQAvD_BwE">https://www.sigmaaldrich.com/US/en/product/mm/scc109?gclid=CjwKCAiAqNSsBhAvEiwAn_tmXy5Ra9IYHp0xTVteqErJ2Ou1pAzyrv0AV1aVeEJzUsWowUB9lpMaQBoCHNMQAvD_BwE</a> |

### Data & Code Availability

| Description                                                        | Source / Repository                                                     | Persistent ID / URL |
|--------------------------------------------------------------------|-------------------------------------------------------------------------|---------------------|
| RNAseq Data                                                        | data will be available using the online <i>figshare</i> data repository |                     |
| Raw data files and Prism analysis files organized by figure panels | data will be available using the online <i>figshare</i> data repository |                     |
|                                                                    |                                                                         |                     |

### Other

| Description                                                      | Source / Repository                      | Catalog Number |
|------------------------------------------------------------------|------------------------------------------|----------------|
| <b>Reagents and Chemicals</b>                                    |                                          |                |
| Dulbecco's modified Eagle's medium (DMEM) high glucose, pyruvate | Life Technologies, Grand Island, NY, USA | 11-995-073     |

|                                                                        |                                                   |            |
|------------------------------------------------------------------------|---------------------------------------------------|------------|
| Fetal Bovine Serum (FBS)                                               | Life Technologies,<br>Grand Island, NY,<br>USA    | 26-140-079 |
| Antibiotic-Antimycotic (100X)                                          | Life Technologies,<br>Grand Island, NY,<br>USA    | 15-240-062 |
| DPBS, no calcium, no magnesium                                         | Life Technologies,<br>Grand Island, NY,<br>USA    | 14-190-235 |
| Opti-MEM™ I Reduced Serum Medium                                       | Life Technologies,<br>Grand Island, NY,<br>USA    | 31-985-070 |
| Bovine Serum Albumin                                                   | Sigma Aldrich, St.<br>Louis, MO, USA              | A7906-100G |
| 10X RIPA Lysis Buffer                                                  | MilliporeSigma,<br>Burlington, MA, USA            | 20-188     |
| Paraformaldehyde Solution, 4% in PBS                                   | Thermo Fisher<br>Scientific™, Waltham,<br>MA, USA | AAJ19943K2 |
| Triton™ X-100                                                          | Sigma Aldrich, St.<br>Louis, MO, USA              | T8787      |
| TWEEN® 20                                                              | Sigma Aldrich, St.<br>Louis, MO, USA              | P9416      |
| ViaFect™ Transfection Reagent                                          | Promega, Madison,<br>WI, USA                      | E4982      |
| Duolink® In Situ PLA® Probe Anti-Mouse<br>MINUS                        | MilliporeSigma,<br>Burlington, MA, USA            | DUO92004   |
| Duolink® In Situ PLA® Probe Anti-Rabbit<br>PLUS                        | MilliporeSigma,<br>Burlington, MA, USA            | DUO92002   |
| Duolink® In Situ Detection Reagents<br>Red                             | MilliporeSigma,<br>Burlington, MA, USA            | DUO92008   |
| PowerUp™ SYBR™ Green Master Mix                                        | Thermo Fisher<br>Scientific™, Waltham,<br>MA, USA | A25776     |
| Halt™ Protease and Phosphatase<br>Inhibitor Single-Use Cocktail (100X) | Thermo Fisher<br>Scientific™, Waltham,<br>MA, USA | 78442      |
| SuperSignal West Pico PLUS<br>Chemiluminescent Substrate               | Thermo Fisher<br>Scientific™, Waltham,<br>MA, USA | 34577      |

| <b>Kits</b>                                           |                               |                       |
|-------------------------------------------------------|-------------------------------|-----------------------|
| <b>Description</b>                                    | <b>Source / Repository</b>    | <b>Catalog Number</b> |
| Trans-Blot Turbo RTA Mini 0.2 µm PVDF<br>Transfer Kit | Bio Rad, Hercules,<br>CA, USA | 1704272               |
| Stain Free Mini-PROTEAN® TGX™<br>Precast Gels         | Bio Rad, Hercules,<br>CA, USA | 4568026               |

DOI [to be added]

|                               |                                             |            |
|-------------------------------|---------------------------------------------|------------|
| Pierce™ BCA Protein Assay Kit | Thermo Fisher Scientific™, Waltham, MA, USA | 23225      |
| PureLink® RNA Mini Kit        | Life Technologies, Grand Island, NY, USA    | 12-183-020 |
| SuperScript IV VILO Kit       | Thermo Fisher Scientific™, Waltham, MA, USA | 11-756-050 |
| ELISA cAMP assay              | Abcam                                       | ab290713   |

| <b>Drugs</b>                            |                                             |                       |
|-----------------------------------------|---------------------------------------------|-----------------------|
| <b>Description</b>                      | <b>Source / Repository</b>                  | <b>Catalog Number</b> |
| (-) – Epinephrine<br>[RRID: SCR_003281] | Sigma Aldrich, St. Louis, MO, USA           | E4250-10G             |
| Forskolin                               | Sigma Aldrich, St. Louis, MO, USA           | F3917-10MG            |
| PF-04597325                             | Thermo Fisher Scientific™, Waltham, MA, USA | 50-202-9122-1MG       |
| IBMX                                    | Sigma Aldrich, St. Louis, MO, USA           | I5879                 |
| Rolipram                                | Sigma Aldrich, St. Louis, MO, USA           | R6520                 |
| PTX                                     | Thermo Fisher Scientific™, Waltham, MA, USA | PHZ1174               |
| ICI-118551                              | Sigma Aldrich, St. Louis, MO, USA           | I127-25MG             |
| CGP-20712A                              | Sigma Aldrich, St. Louis, MO, USA           | C231-10MG             |

| <b>RTqPCR Primers – Human</b> |                       |                       |
|-------------------------------|-----------------------|-----------------------|
| <b>Description</b>            | <b>Forward Primer</b> | <b>Reverse Primer</b> |
| <b>AKAP12</b>                 | GCTGGACAGGAAACGGAGAA  | CACTGCGGTTGACTCTGACT  |
| <b>PDE1A</b>                  | AGGTCACCTCCAGCAAATTA  | CCACATAGGAAGAAGTTTCG  |
| <b>PDE1C</b>                  | AGATATTAGCCATCCAGCAA  | CAACGGAGATGACAGAAT    |
| <b>PDE2A</b>                  | CCTTCAACAAGCTAGAAGGA  | CGGATCTCATAGCTCTCATC  |
| <b>PDE3A</b>                  | CAACTGTGTGTGTGTGTG    | CAAGTGGTGCATAGCAGTAA  |
| <b>PDE4A</b>                  | GCTGAAGACCTCATCGTAAC  | ATTCTGTTTGTCCAGGAATG  |
| <b>PDE4C</b>                  | AGAGTGGTACCAGAGCAAGA  | TGGGAGCCACCTATAACTAA  |
| <b>PDE4D</b>                  | CACCAAATGACCTTACCTGT  | AGCTCCACTGTTACCTTTCA  |
| <b>PDE5A</b>                  | GAAAAGGACTTTGCTGCTTA  | TGATTTTGTTCATCATGT    |
| <b>PDE7A</b>                  | GCAATATGAATTTGGCTTTC  | GGAAAGAGCTGCAGTCTAAA  |
| <b>PDE7B</b>                  | TCTTCAATACCCATGGACTC  | ATCCTGTGTCATTTCTTTG   |
| <b>PDE8A</b>                  | ACCAATGTAATGGATTCTGC  | TGAGTTACAAGCCCTGAGTT  |

|                                   |                              |                                |
|-----------------------------------|------------------------------|--------------------------------|
| <b>PDE8B</b>                      | AGAACAGGAGGAAAGAGTCC         | CGTTTCCTGACAGTCTTCTC           |
| <b>GAPDH</b>                      | GTCTCCTCTGACTTCAACAGCG       | ACCACCCTGTTGCTGTAGCCAA         |
| <b>HPRT1</b>                      | CTTGAGCACACAGAGGGCTACA       | CATTATGCTGAGGATTTGGAAAG        |
| <b>RTqPCR Primers – Mouse</b>     |                              |                                |
| <b>Description</b>                | <b>Forward Primer</b>        | <b>Reverse Primer</b>          |
| <b>AKAP12</b>                     | GTCCAAGAGGAAAGCCAGGATG       | CTGTGGAACTGGCTGCCATTTT         |
| <b>PDE1A</b>                      | TGACGTCACTCAAACGTGCATT       | CCATGGCTAAAATTTCCAGTTCA        |
| <b>PDE1C</b>                      | GAAGACAGCCCTGCAGCAA          | GTGTAACATGAGGGATAAGGCTTTC      |
| <b>PDE2A</b>                      | ATGAGCTGCCACAGGAAGGA         | ATTGCAACTCAGCCGCTTCT           |
| <b>PDE3A</b>                      | TTCAGAATGGGACCACAAGAGA       | TCACCCATCACAGCAATATCCA         |
| <b>PDE3B</b>                      | GGGACTTGAAGCAGTGGTGAAA       | AGCACTGAAAGATCAACTCCATTTT      |
| <b>PDE4D</b>                      | CCTAACTAATTCATGTATCCCCAGGTT  | GGCCCCACTTGTTCCACATCT          |
| <b>PDE5A</b>                      | AATACCACCCCTGGAGCACC         | TTCAAGGGCTCGCCAAAAGC           |
| <b>PDE8A</b>                      | TCAGAGTGTGCAATGGCAAC         | GTCCATCGAATGTTTCCTCC           |
| <b>AC5</b>                        | CACCGCCAATGCCATAGAC          | CTTCAGCGCCACCTTGGT             |
| <b>AC6</b>                        | CTTCATCTGTTTTATCCAGCTCCTT    | CGGCATAAATCCCGAGTATCA          |
| <b>AC8</b>                        | GGATCTACATCCATCGCTATGAGA     | CGTGGAGAGGTTGGTAAATCCT         |
| <b>HPRT1</b>                      | GCTTGCTGGTGAAAAGGACCTCTCGAAG | CCCTGAAGTACTCATTATAGTCAAGGGCAT |
| <b>RPL4</b>                       | GCCGCTGGTGGTTGAAGATAA        | CGTCGGTTTCTCATTTTGCCC          |
| <b>Genotyping Primers – Mouse</b> |                              |                                |
| <b>Description</b>                | <b>Forward Primer</b>        | <b>Reverse Primer</b>          |
| <b>AKAP12-OX</b>                  | ACTTGCGTTTCTGATAGTTCTGA      | CAGAGATGAGTTTCTGCTCGCTAG       |

## ARRIVE GUIDELINES

The ARRIVE guidelines (<https://arriveguidelines.org/>) are a checklist of recommendations to improve the reporting of research involving animals. Key elements of the study design should be included below to better enable readers to scrutinize the research adequately, evaluate its methodological rigor, and reproduce the methods or findings.

### Study Design

| Groups                                                             | Genotype             | Sex        | Age           | Number (prior to experiment) | Number (after termination) | Littermates (Yes/No) | Other description |
|--------------------------------------------------------------------|----------------------|------------|---------------|------------------------------|----------------------------|----------------------|-------------------|
| Group 1<br>(Sham;<br>control for<br>pump<br>insertion and<br>drug) | WT                   | M<br>and F | 8-12<br>Weeks | 10                           | M: 10<br>F: 9              | Yes                  |                   |
| Group 2<br>(Vehicle;<br>control for<br>drug only)                  | WT                   | M<br>and F | 8-12<br>Weeks | 8                            | M: 6<br>F: 8               | Yes                  |                   |
| Group 3<br>(ISO;<br>experimental<br>group)                         | WT                   | M<br>and F | 8-12<br>Weeks | 10                           | M: 9<br>F: 8               | Yes                  |                   |
| Group 4<br>(Sham;<br>control for<br>pump<br>insertion and<br>drug) | AKAP12 <sup>OX</sup> | M<br>and F | 8-12<br>Weeks | 10                           | M: 7<br>F: 6               | Yes                  |                   |
| Group 5<br>(Vehicle;<br>control for<br>drug only)                  | AKAP12 <sup>OX</sup> | M<br>and F | 8-12<br>Weeks | 8                            | M: 4<br>F: 5               | Yes                  |                   |
| Group 6<br>(ISO;<br>experimental<br>group)                         | AKAP12 <sup>OX</sup> | M<br>and F | 8-12<br>Weeks | 10                           | M: 6<br>F: 9               | Yes                  |                   |

**Sample Size:** Please explain how the sample size was decided. Please provide details of any *prior* sample size calculation, if done.

For sample size calculations, we used power analysis to determine the minimum sample size required for statistical significance; providing high values for sample size (n=9) for physiological experiments.

### Inclusion Criteria

The study included male and female mice of two genotypes (WT and AKAP12<sup>OX</sup>), aged 8-12 weeks, with a healthy cardiac function before osmotic pump insertion.

### Exclusion Criteria

DOI [to be added]

Mice that did not survive the 14-day study period or mice that survived but had a Heart Rate (HR) below 400 bpm or above 650 bpm were excluded from the analysis<sup>2</sup>.

### **Randomization**

Sample Randomization within Litter-Based Stratification; To achieve a balanced distribution of mice across experimental conditions, a sample randomization strategy was employed within the framework of litter-based stratification. Litters, defined as groups of mice born to the same mother during a single reproductive cycle served as the basis for stratification. The randomization process ensured that each experimental group included a representative yet random subset of mice from various litters. This approach was implemented to control potential genetic and environmental factors shared among littermates, contributing to the robustness and internal validity of the study design.

### **Blinding**

Blinding procedures were implemented in the acquisition and analysis of echocardiography for mouse genotypes. Similarly, human samples remained blinded until both RT-qPCR and Western Blot analyses were finalized.

1. Davidson MM, Nesti C, Palenzuela L, Walker WF, Hernandez E, Protas L, et al. Novel cell lines derived from adult human ventricular cardiomyocytes. *J Mol Cell Cardiol.* 2005;39:133-147
2. Lindsey ML, Kassiri Z, Virag JAI, de Castro Bras LE, Scherrer-Crosbie M. Guidelines for measuring cardiac physiology in mice. *Am J Physiol Heart Circ Physiol.* 2018;314:H733-H752
